# Supplementary material for: Unsymmetrical pentamethine cyanines for visualizing physiological acidities from the whole-animal to the cellular scale with pH-responsive deep-red fluorescence
Source: Royal Society of Chemistry journal article supplement (doi:10.1039/d1ra02217b), 2021-01-01
Supplement: d1ra02217b1.pdf [file d1ra02217b1.pdf]

**Unsymmetrical pentamethine cyanines visualizing physiologic acidities from whole animal to cellular scale with pH-responsive deep-red fluorescence**

Yicheng Wang<sup>1a</sup>, Zuhai Lei<sup>1a</sup>, Cong Wang<sup>a</sup>, Chong Cao<sup>a</sup>, Jiayi Hu<sup>a</sup>, Ling Du<sup>\* b</sup>, Limei Han<sup>\* a</sup> and Cong Li<sup>\* a</sup>

<sup>a</sup>Minhang Hospital and Key Laboratory of Smart Drug Delivery, Ministry of Education, School of Pharmacy, Fudan University, Shanghai 201203, China. E-mail: [congli@fudan.edu.cn](mailto:congli@fudan.edu.cn)

<sup>b</sup>Key Laboratory of digestive cancer full cycle monitoring and precise intervention of Shanghai Municipal Health Commission, Minhang Hospital, Fudan University, Xingsong Road 170, Shanghai 201100, China

<sup>1</sup>These authors contributed equally to this work

**Supporting Information**

**Table of contents**

|                                                     |     |
|-----------------------------------------------------|-----|
| 1. Additional Figures and Tables .....              | S2  |
| 2. NMR spectra of dyes DR1–6. ....                  | S7  |
| 3. High-resolution mass spectra of dyes DR1–6. .... | S13 |

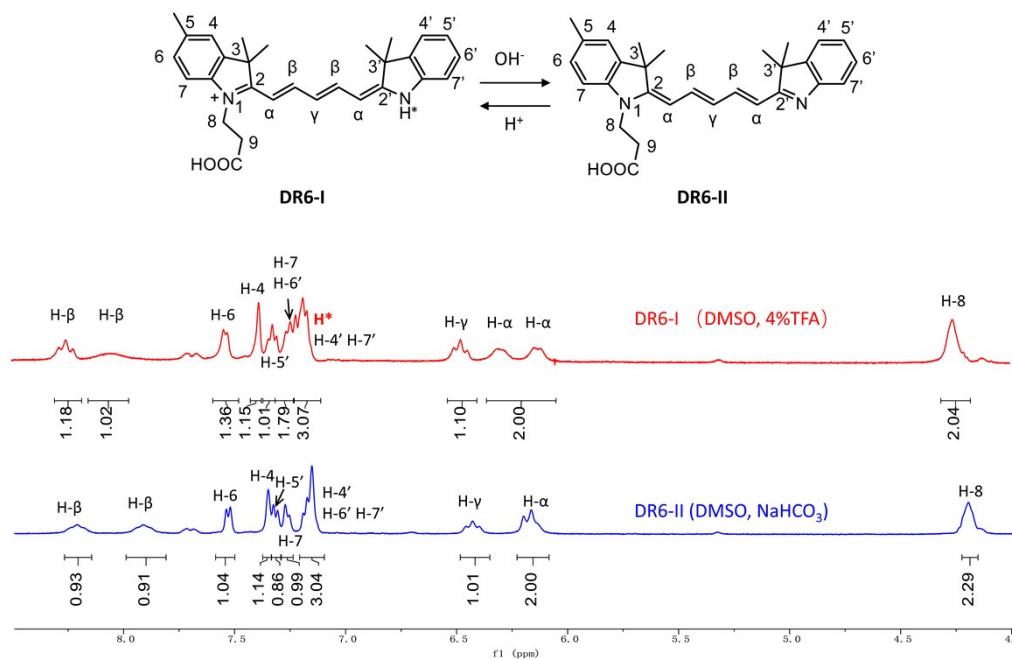

## 1. Additional Figures and Tables

**Figure. S1.**  $^1\text{H-NMR}$  spectra of **DR6** (500 MHz,  $\text{DMSO-d}_6$ ) with its protonated with 4% TFA (**DR6-I**) and deprotonated forms with  $\text{NaHCO}_3$  (**DR6-II**).<sup>1</sup> The significant distinction between protonated form (**DR6-I**) and deprotonated form (**DR6-II**) is the proton in the indole nitrogen atom ( $\text{H}^*$ ). The NMR spectra of **DR6-I** and **DR6-II** were shown below (**Figure. RL4**). The NMR peak of  $\text{H}^*$  was only observed in the spectra of **DR6-I**. Furthermore, addition of acid led to downfield shifts of all proton signals, which may attribute to the decrease of electron density. Besides, the chemical shift of  $\text{H-8}$  was 4.28 and 4.19 in **DR6-I** and **DR6-II**, respectively, which correlated well with the increased electron-withdrawing ability of quaternary ammonium.

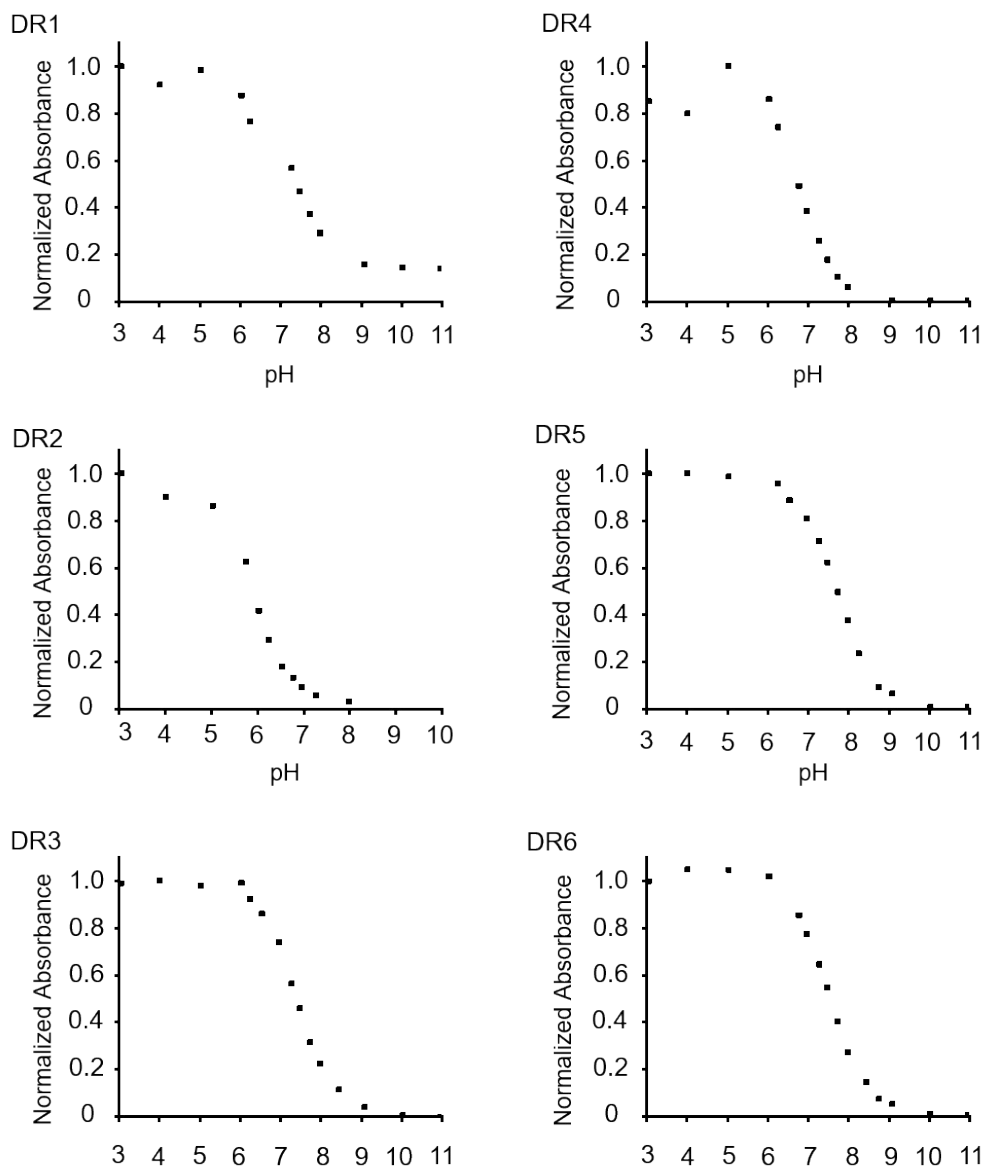

**Figure. S2.** pH dependence of the normalized absorbance (absorbance/absorbance<sub>max</sub>)

**Table S1.** TDDFT excitation energies, oscillator strengths, calculated absorption wavelengths and experimental absorption wavelengths of **DR1-6**.

| Compounds  | Form         | $\Delta E/ \text{eV}$ | f    | Theory                               | Experiment                           |
|------------|--------------|-----------------------|------|--------------------------------------|--------------------------------------|
|            |              |                       |      | $\lambda_{\text{Abs (max)}}$ /<br>nm | $\lambda_{\text{Abs (max)}}$ /<br>nm |
| <b>DR1</b> | protonated   | 2.47                  | 2.13 | 525                                  | 637                                  |
|            | deprotonated | 2.72                  | 1.89 | 493                                  | 486                                  |
| <b>DR2</b> | protonated   | 2.46                  | 2.14 | 525                                  | 635                                  |
|            | deprotonated | 2.69                  | 1.91 | 497                                  | 463                                  |
| <b>DR3</b> | protonated   | 2.51                  | 2.17 | 512                                  | 636                                  |
|            | deprotonated | 2.70                  | 1.85 | 496                                  | 488                                  |
| <b>DR4</b> | protonated   | 2.49                  | 2.21 | 526                                  | 635                                  |
|            | deprotonated | 2.79                  | 2.09 | 484                                  | 475                                  |
| <b>DR5</b> | protonated   | 2.38                  | 2.02 | 548                                  | 647                                  |
|            | deprotonated | 2.64                  | 1.82 | 510                                  | 500                                  |
| <b>DR6</b> | protonated   | 2.44                  | 2.14 | 532                                  | 641                                  |
|            | deprotonated | 2.69                  | 1.91 | 499                                  | 497                                  |

$\lambda_{\text{Abs max}}$  is the absorption maxima .  $\Delta E$  is The excitation HOMO–LUMO energy gap. f represents oscillator strengths.

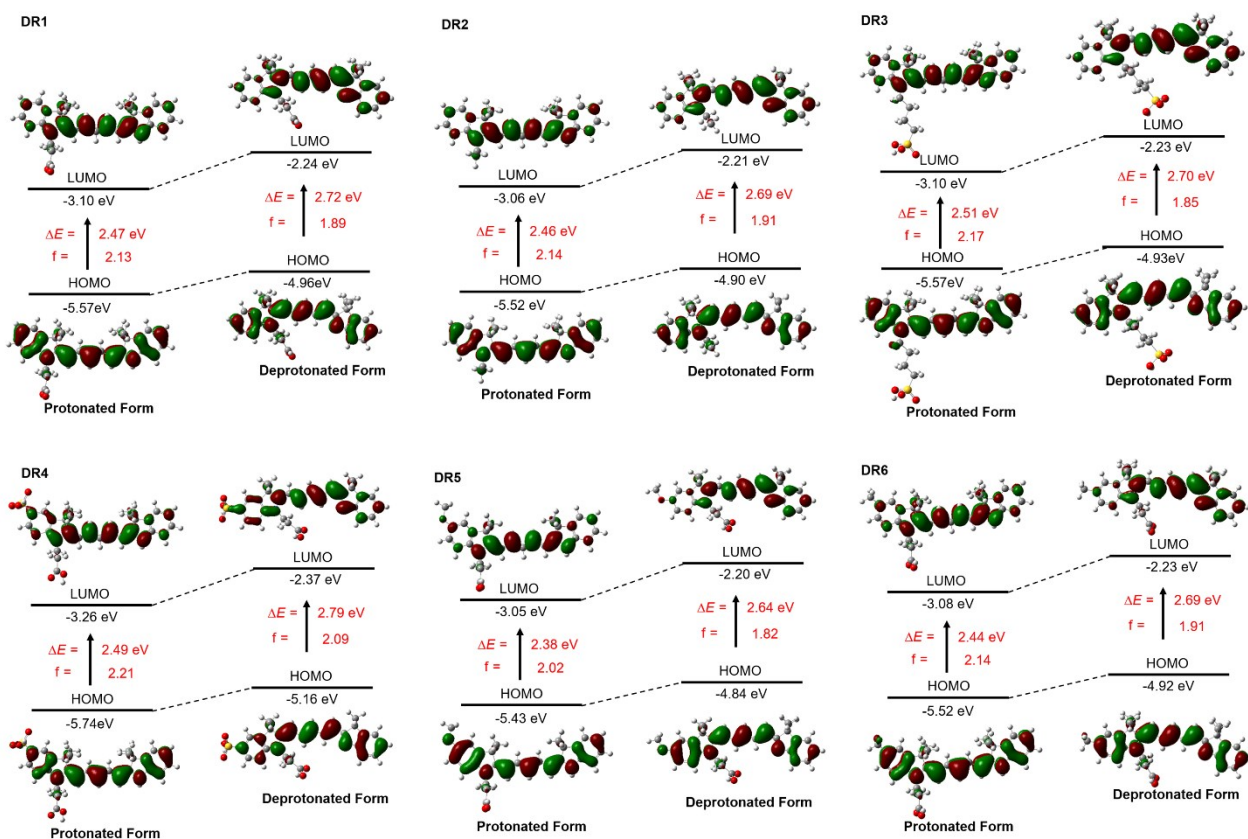

**Figure S3.** Comparison of the HOMO and LUMO energy levels, excitation energies, and oscillator strengths for **DR1-6**, based on TDDFT calculations at the B3LYP/6-311 G(d,p) level.

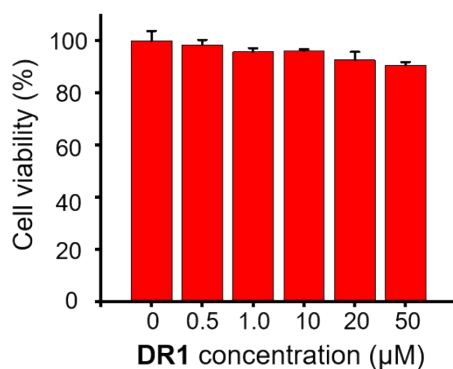

**Fig. S4.** Cell viability of **DR1** on HeLa cells by a standard CCK-8 assay. Data are expressed as mean values  $\pm$  standard error of the mean of three independent experiments.

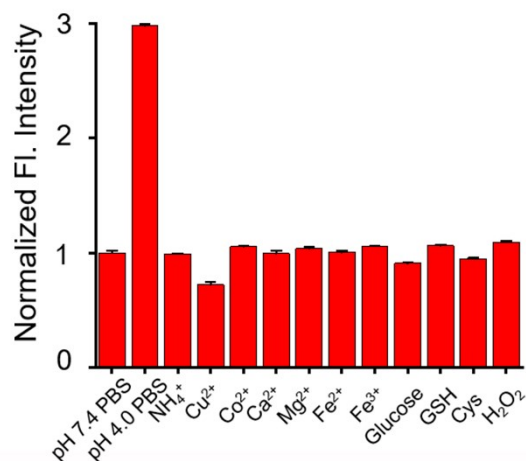

**Fig. S5.** Fluorescence intensities of **DR1** (1.0 µM) in the presence of endogenous ions and other potential interferents in phosphate buffer (pH 7.4) (200 µM for NH<sub>4</sub><sup>+</sup>, Cu<sup>2+</sup>, Co<sup>2+</sup>, Ca<sup>2+</sup>, Mg<sup>2+</sup>, Fe<sup>2+</sup>, Fe<sup>3+</sup>, H<sub>2</sub>O<sub>2</sub> and 5 mM for Glucose, Glutathione and Cysteine). Data were acquired in with  $\lambda_{ex}$ = 640 nm. Each experiment was performed in triplicate, and error bars are determined from the mean and standard deviation (SD).

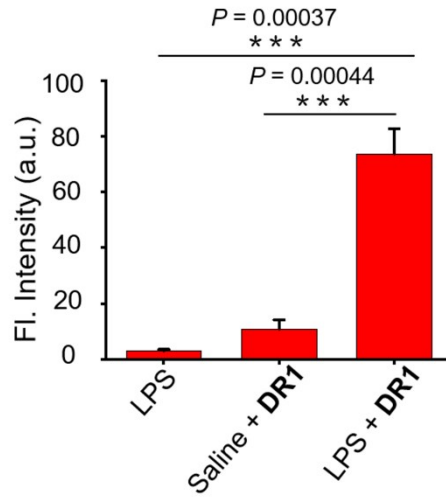

**Fig. S6.** Mean fluorescence intensity in the abdominal region at 30 min post administration of **DR1** (n = 3). Error bars represent mean deviation (S.D.), *P* values were calculated using two-tailed Student's *t*-tests.

## 2. NMR spectra of dyes DR1-6.

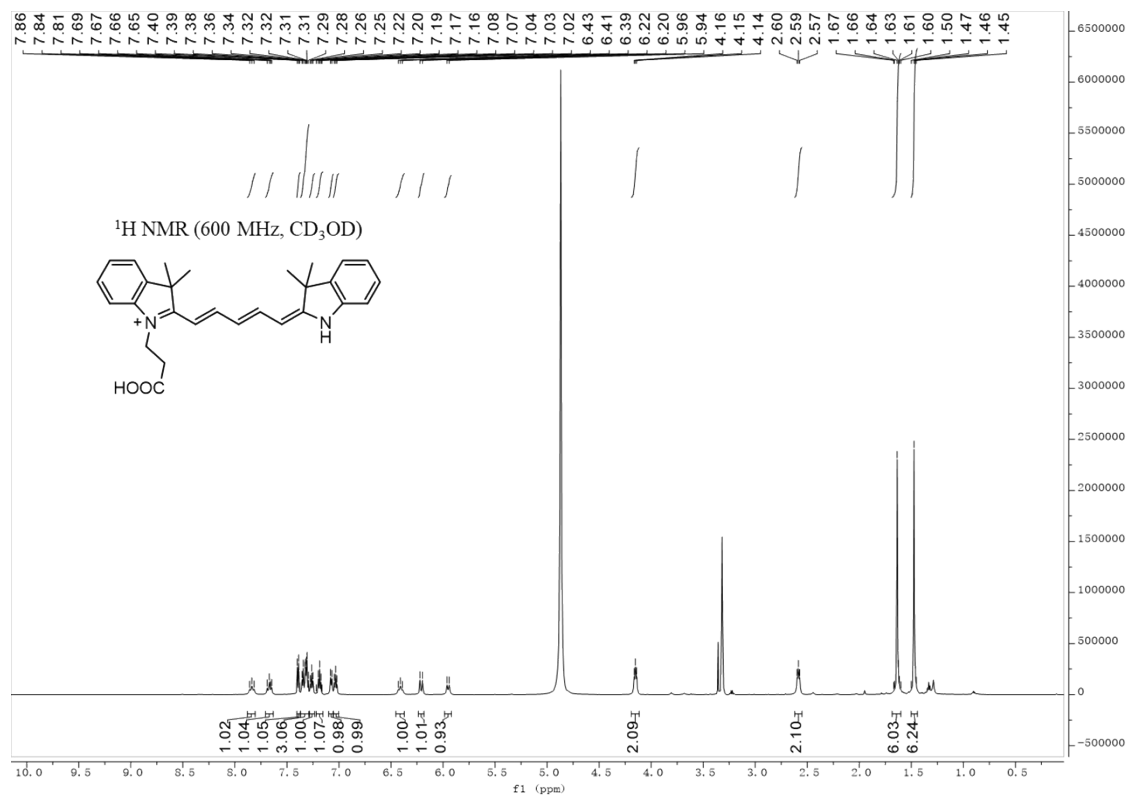

## <sup>1</sup>H NMR spectra of DR1

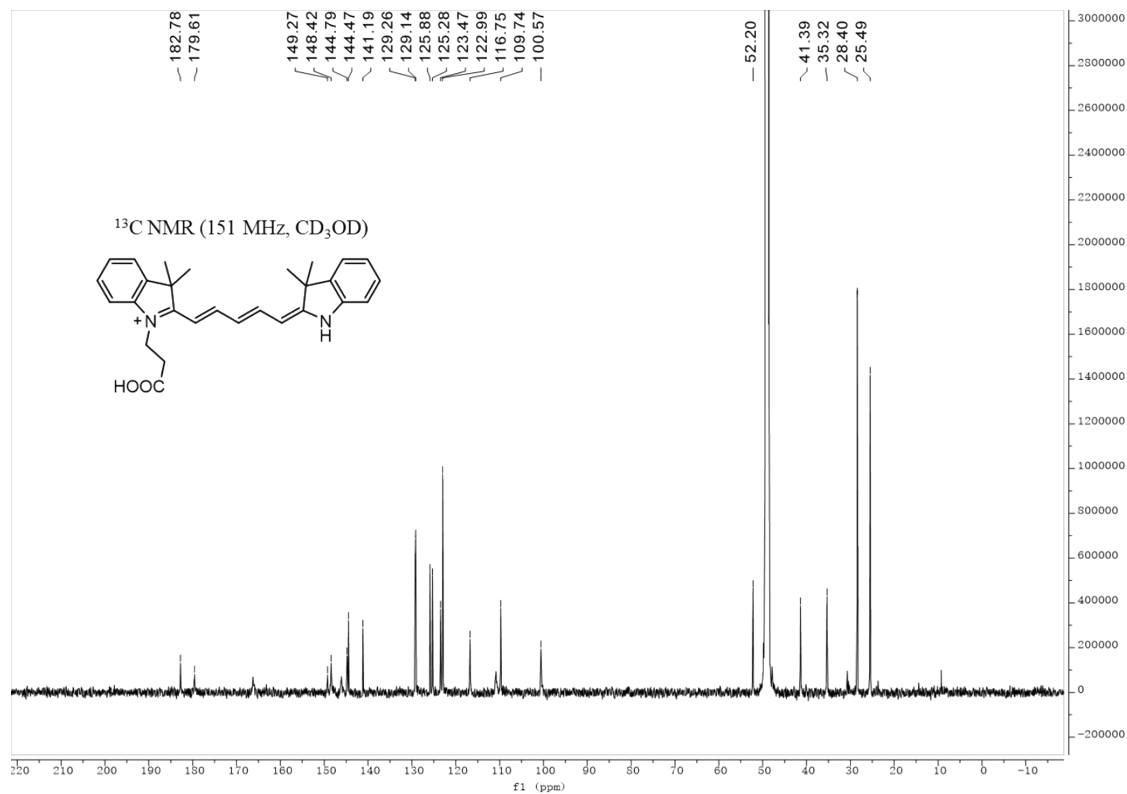

## <sup>13</sup>C NMR spectra of DR1





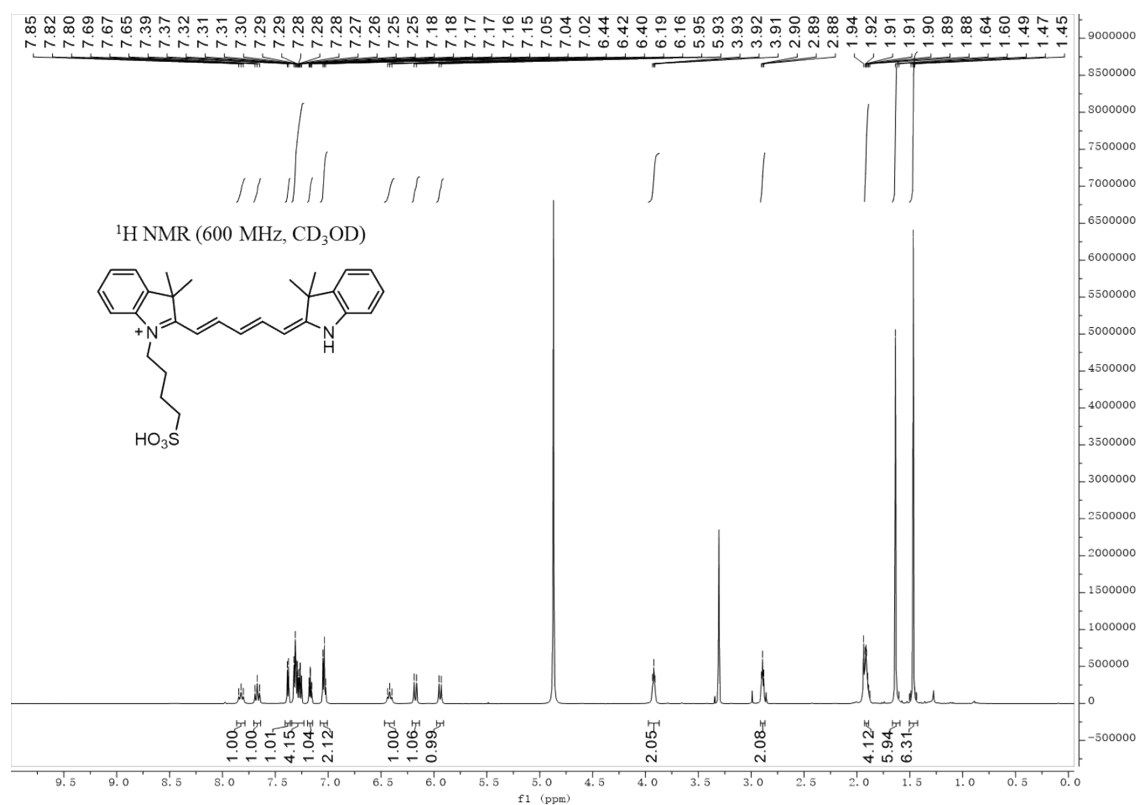

<sup>1</sup>H NMR spectra of DR3

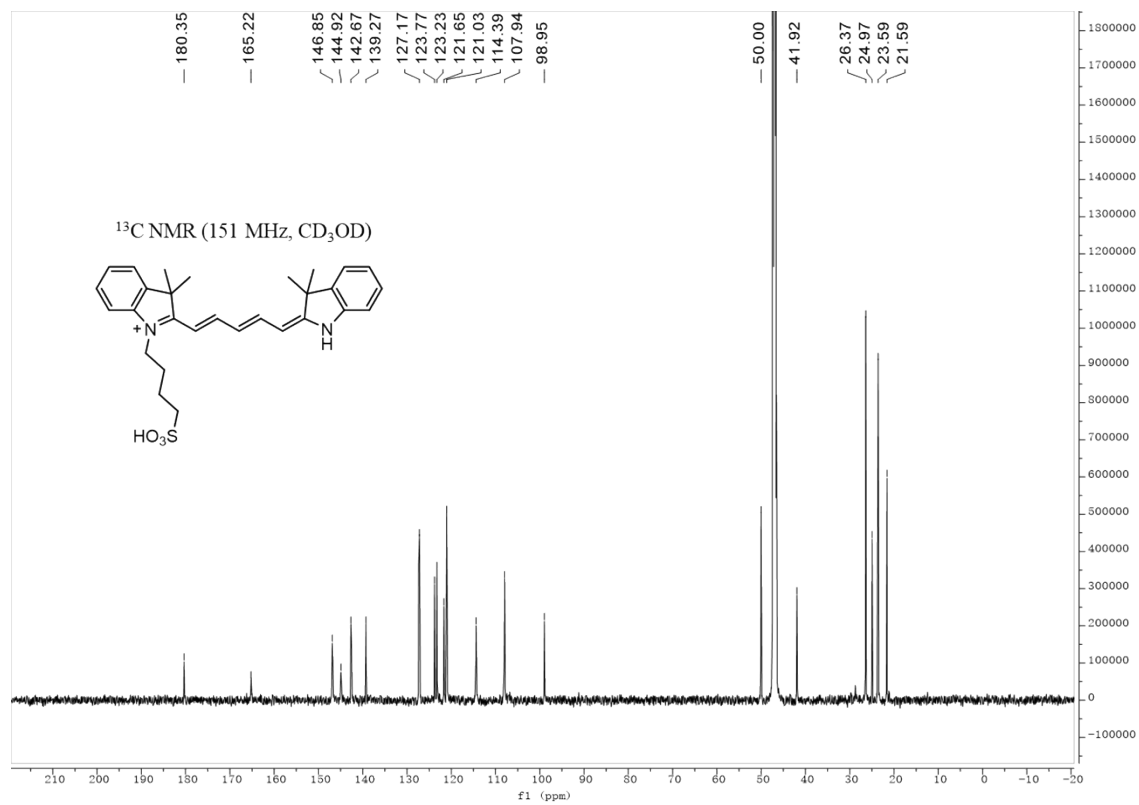

<sup>13</sup>C NMR spectra of DR3



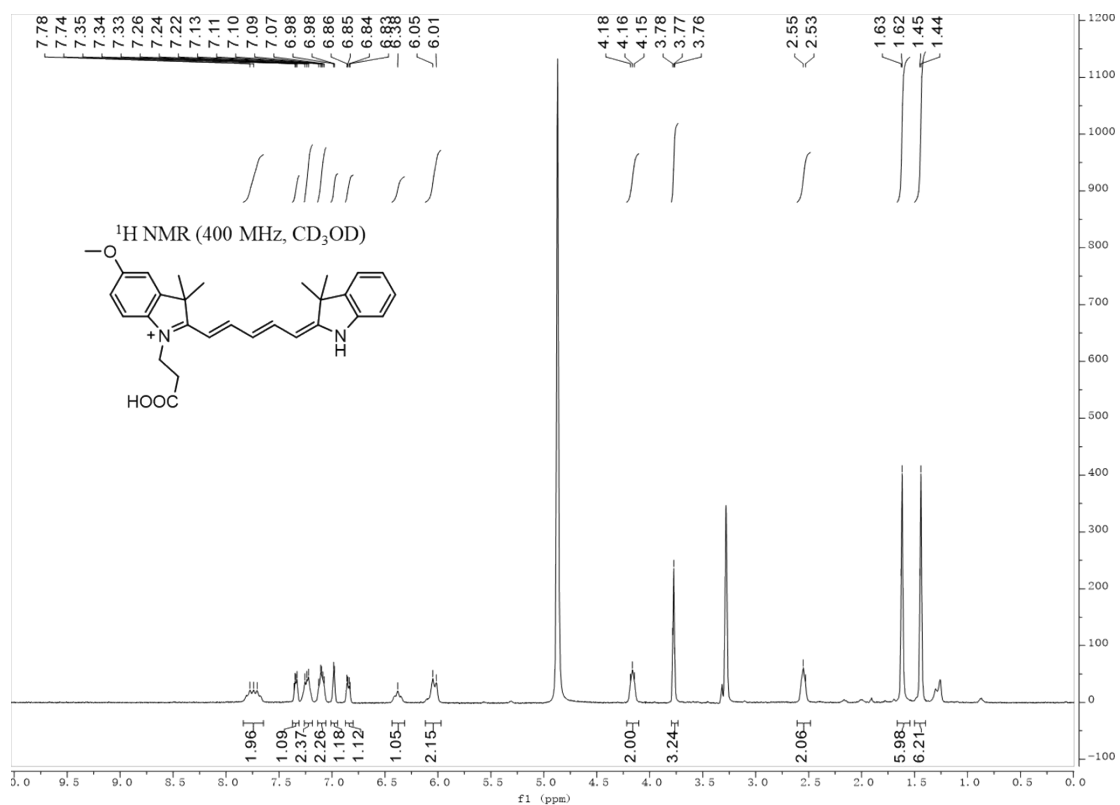

<sup>1</sup>H NMR spectra of DR5

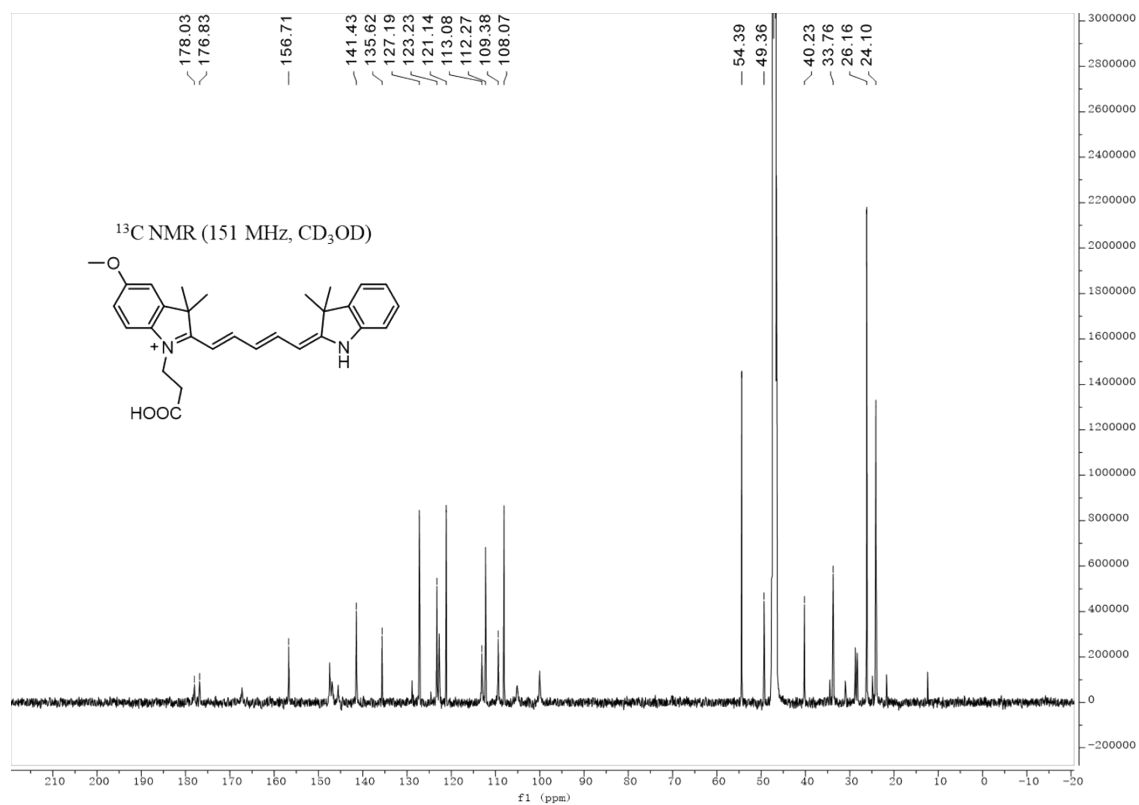

<sup>13</sup>C NMR spectra of DR5

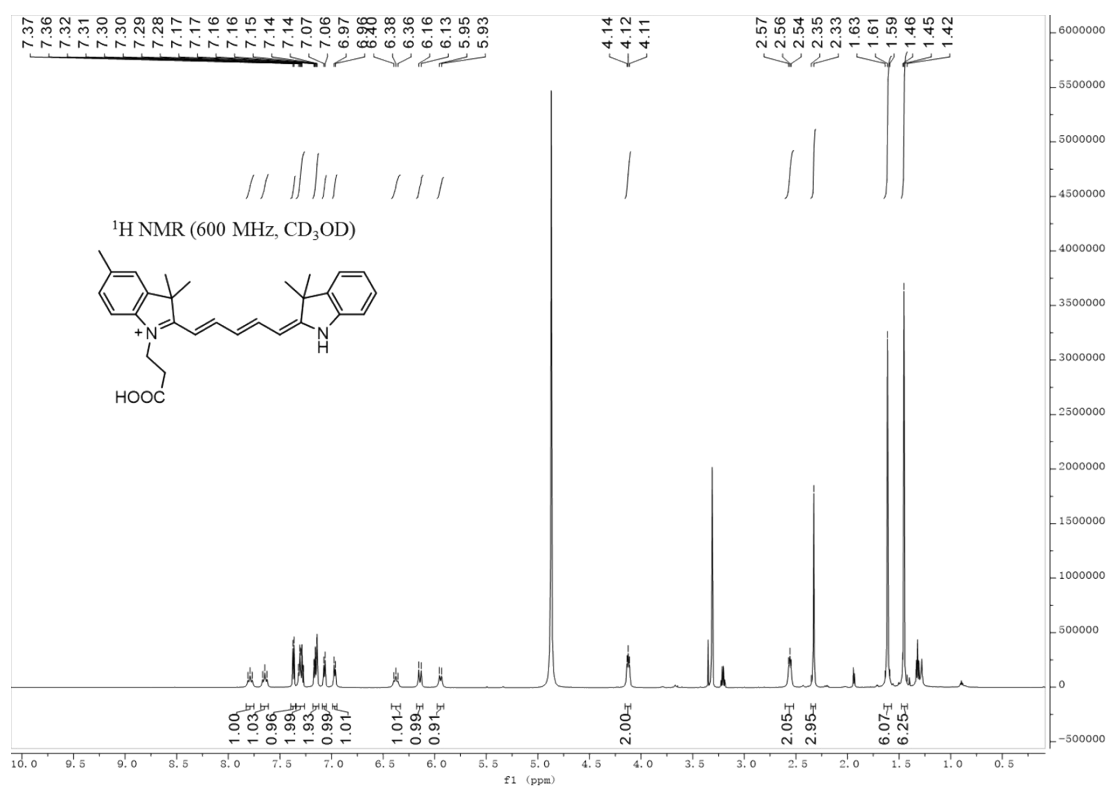

<sup>1</sup>H NMR spectra of DR6

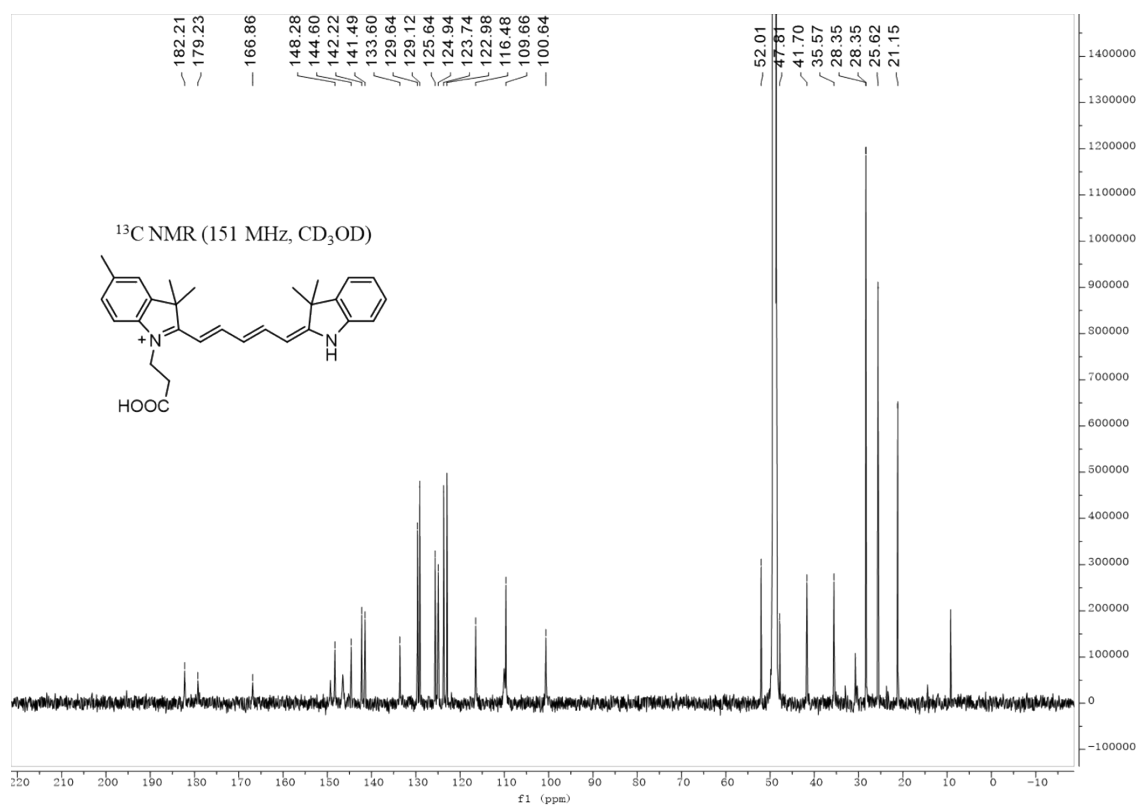

<sup>13</sup>C NMR spectra of DR6

### 3. High-resolution mass spectra of dyes DR1–6.

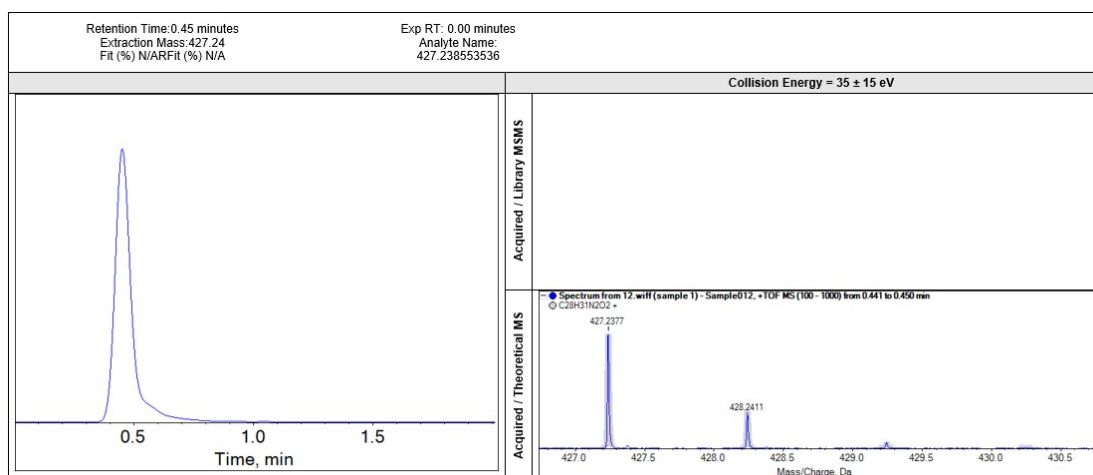

| ✓✓✓✓ | Compound Name (Library Hit) | Score | Formula                                                       | Intensity | Threshold | Expected m/z | Found at m/z | Error (ppm) | Expected RT (min) | Found RT (min) | RT Delta (min) | Isotope Diff (%) | Library Score(%) |
|------|-----------------------------|-------|---------------------------------------------------------------|-----------|-----------|--------------|--------------|-------------|-------------------|----------------|----------------|------------------|------------------|
| ✓✓✓✓ | 427.238553536(CYS-COOH)     | 97%   | C <sub>28</sub> H <sub>31</sub> N <sub>2</sub> O <sub>2</sub> | 492797    | 5         | 427.2380     | 427.2377     | -0.8        | 0.00              | 0.45           | 0.45           | 1.2%             | N/A              |

### High-resolution mass spectra of DR1

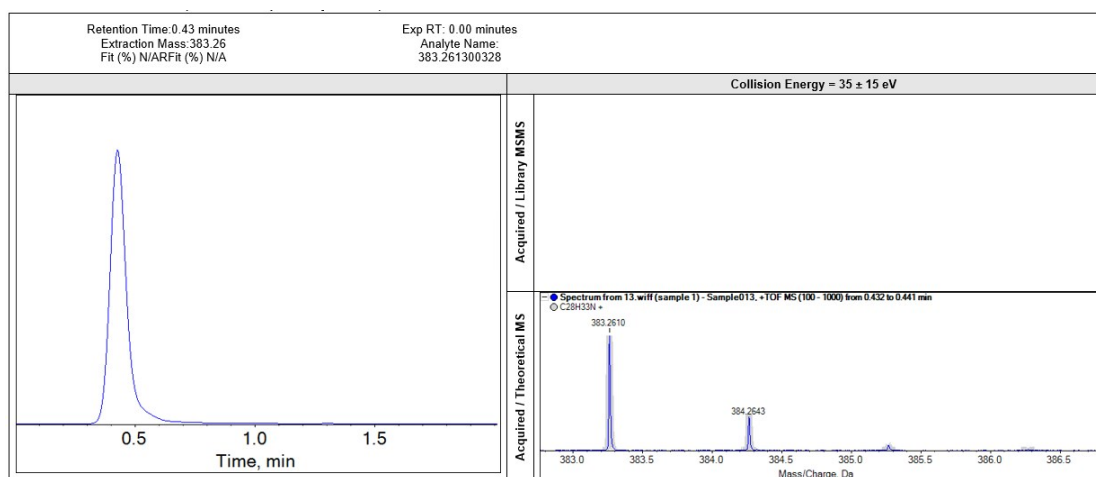

| ✓✓✓✓ | Compound Name (Library Hit) | Score | Formula                           | Intensity | Threshold | Expected m/z | Found at m/z | Error (ppm) | Expected RT (min) | Found RT (min) | RT Delta (min) | Isotope Diff (%) | Library Score(%) |
|------|-----------------------------|-------|-----------------------------------|-----------|-----------|--------------|--------------|-------------|-------------------|----------------|----------------|------------------|------------------|
| ✓✓✓✓ | 383.261300328(CYS-Et)       | 96%   | C <sub>28</sub> H <sub>33</sub> N | 496196    | 5         | 383.2608     | 383.2610     | 0.6         | 0.00              | 0.43           | 0.43           | 2.8%             | N/A              |

### High-resolution mass spectra of DR2

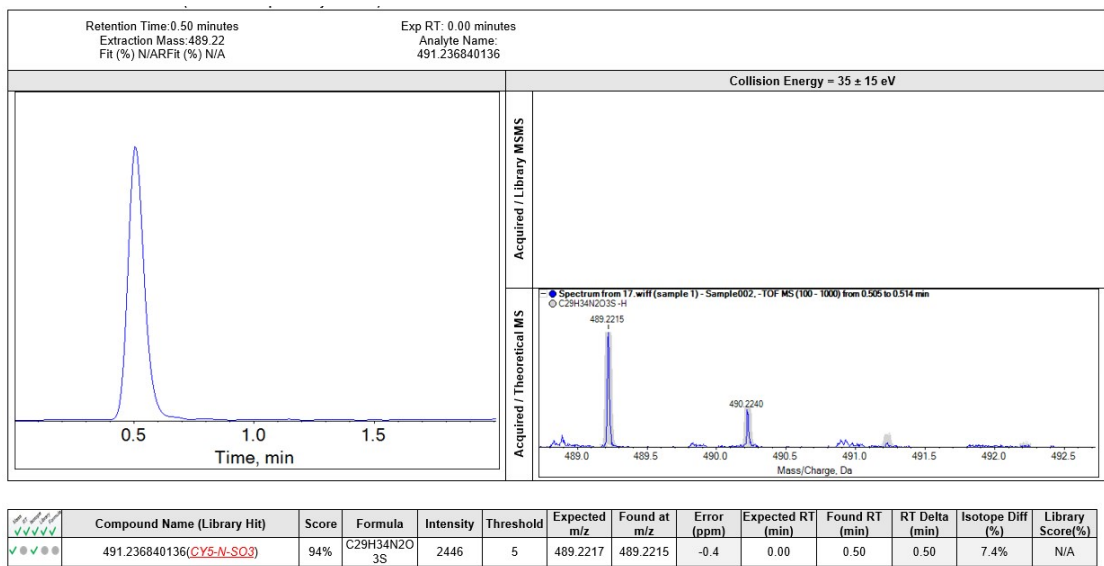

### High-resolution mass spectra of DR3

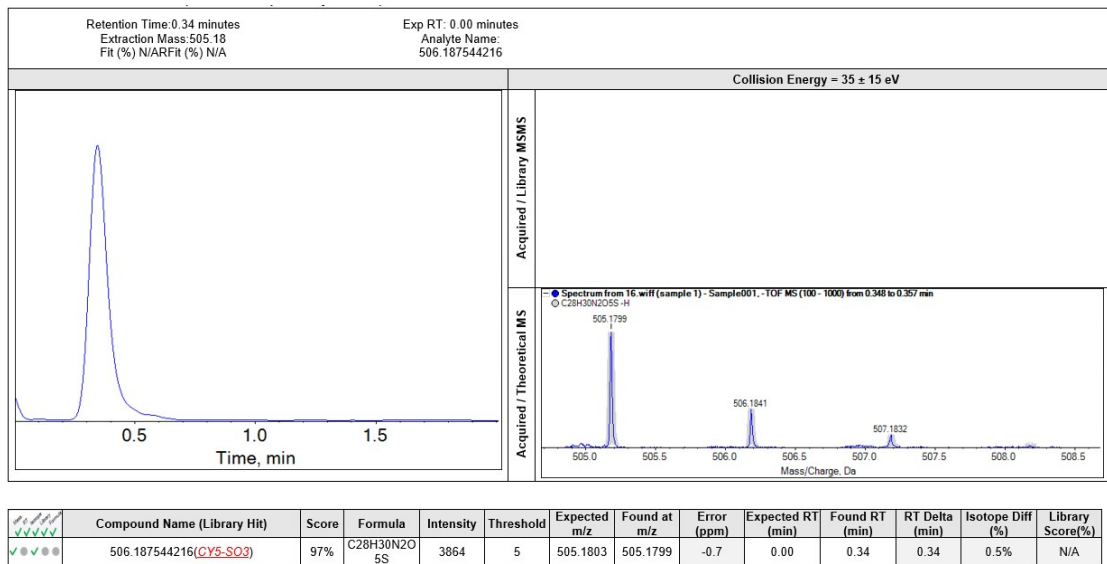

### High-resolution mass spectra of DR4

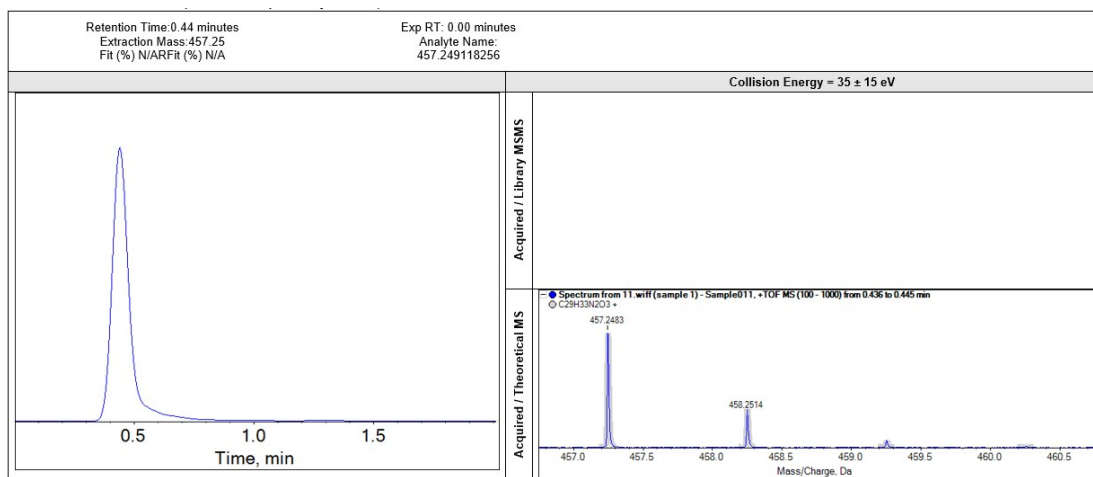

| ✓✓✓✓✓ | Compound Name (Library Hit) | Score | Formula                                                       | Intensity | Threshold | Expected m/z | Found at m/z | Error (ppm) | Expected RT (min) | Found RT (min) | RT Delta (min) | Isotope Diff (%) | Library Score(%) |
|-------|-----------------------------|-------|---------------------------------------------------------------|-----------|-----------|--------------|--------------|-------------|-------------------|----------------|----------------|------------------|------------------|
| ✓●●●● | 457.249118256(CY5-MeO)      | 98%   | C <sub>29</sub> H <sub>33</sub> N <sub>2</sub> O <sub>3</sub> | 1362402   | 5         | 457.2486     | 457.2483     | -0.6        | 0.00              | 0.44           | 0.44           | 0.9%             | N/A              |

### High-resolution mass spectra of DR5

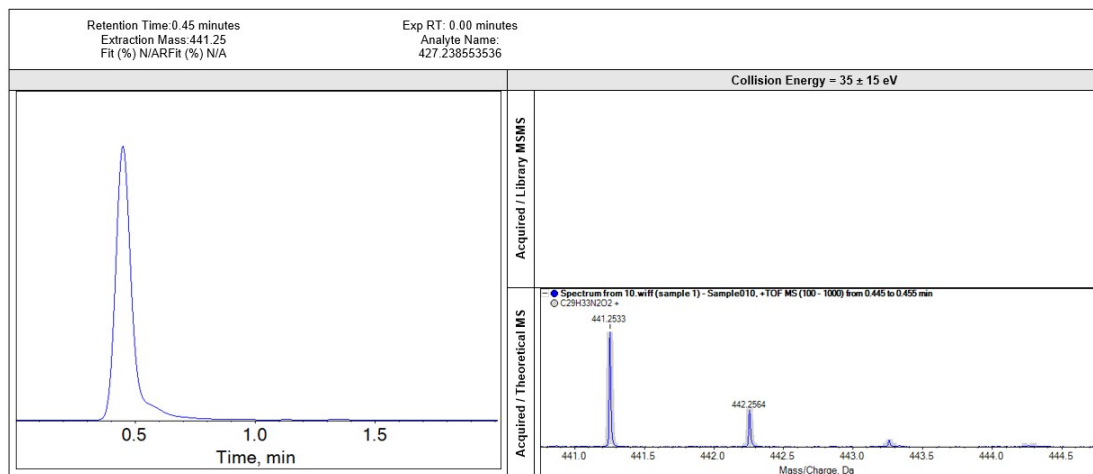

| ✓✓✓✓✓ | Compound Name (Library Hit) | Score | Formula                                                       | Intensity | Threshold | Expected m/z | Found at m/z | Error (ppm) | Expected RT (min) | Found RT (min) | RT Delta (min) | Isotope Diff (%) | Library Score(%) |
|-------|-----------------------------|-------|---------------------------------------------------------------|-----------|-----------|--------------|--------------|-------------|-------------------|----------------|----------------|------------------|------------------|
| ✓●●●● | (CY5-Me)                    | 96%   | C <sub>29</sub> H <sub>33</sub> N <sub>2</sub> O <sub>2</sub> | 308292    | 5         | 441.2537     | 441.2533     | -0.8        | 0.00              | 0.45           | 0.45           | 1.9%             | N/A              |

### High-resolution mass spectra of DR6
